# Supplementary material
Source: publisher figshare collection journal article supplement (https://gsajournals.figshare.com/ndownloader/files/12349523)
Supplement: Supplementary file 1 [file 12349523]

## Sheet: Sheet1
Chrs	SIP Line	No. observed homozygotes	No. predicted homozygotes	Total number of sites	Percent observed homozygotes	Percent predicted homozygotes	Percent difference
X	SIP_L1_1	126075	126364	126533	99.64	99.87	-0.23
X	SIP_L1_10	126011	126333	126499	99.61	99.87	-0.25
X	SIP_L1_2	126009	126317	126470	99.64	99.88	-0.24
X	SIP_L1_3	125987	126359	126514	99.58	99.88	-0.29
X	SIP_L1_4	126075	126324	126490	99.67	99.87	-0.2
X	SIP_L1_5	126017	126379	126530	99.59	99.88	-0.29
X	SIP_L1_6	126014	126352	126536	99.59	99.85	-0.27
X	SIP_L1_7	126026	126347	126505	99.62	99.88	-0.25
X	SIP_L1_8	126089	126372	126538	99.65	99.87	-0.22
X	SIP_L1_9	126008	126340	126523	99.59	99.86	-0.26
X	SIP_L2_1	108687	109106	124965	86.97	87.31	-0.34
X	SIP_L2_10	126406	126747	126856	99.65	99.91	-0.27
X	SIP_L2_2	105025	104503	124411	84.42	84	0.42
X	SIP_L2_3	115240	115618	125450	91.86	92.16	-0.3
X	SIP_L2_4	100679	100341	123865	81.28	81.01	0.27
X	SIP_L2_5	106299	106648	124755	85.21	85.49	-0.28
X	SIP_L2_6	123920	124027	126380	98.05	98.14	-0.08
X	SIP_L2_7	126503	126764	126876	99.71	99.91	-0.21
X	SIP_L2_8	126306	126677	126777	99.63	99.92	-0.29
X	SIP_S1_1	101178	101421	124778	81.09	81.28	-0.19
X	SIP_S1_10	66206	66458	121984	54.27	54.48	-0.21
X	SIP_S1_2	101239	101491	124844	81.09	81.29	-0.2
X	SIP_S1_3	101292	101482	124830	81.14	81.3	-0.15
X	SIP_S1_4	125885	126204	126354	99.63	99.88	-0.25
X	SIP_S1_5	123715	123995	126349	97.92	98.14	-0.22
X	SIP_S1_6	71009	68442	122139	58.14	56.04	2.1
X	SIP_S1_7	67204	67055	122000	55.09	54.96	0.12
X	SIP_S1_8	121952	123618	126233	96.61	97.93	-1.32
X	SIP_S1_9	124165	124573	126376	98.25	98.57	-0.32
X	SIP_S2_1	117041	116229	126934	92.21	91.57	0.64
X	SIP_S2_10	109214	109430	126374	86.42	86.59	-0.17
X	SIP_S2_2	127248	127522	127689	99.65	99.87	-0.21
X	SIP_S2_3	110798	109710	126412	87.65	86.79	0.86
X	SIP_S2_4	109283	109415	126376	86.47	86.58	-0.1
X	SIP_S2_5	127006	127454	127694	99.46	99.81	-0.35
X	SIP_S2_6	117633	117735	126735	92.82	92.9	-0.08
X	SIP_S2_7	120297	120757	127086	94.66	95.02	-0.36
X	SIP_S2_8	122959	122074	127177	96.68	95.99	0.7
X	SIP_S2_9	115612	115845	126878	91.12	91.3	-0.18
2L	SIP_L1_1	223455	223822	223862	99.82	99.98	-0.16
2L	SIP_L1_10	223497	223819	223862	99.84	99.98	-0.14
2L	SIP_L1_2	223406	223784	223820	99.82	99.98	-0.17
2L	SIP_L1_3	207563	207900	216208	96	96.16	-0.16
2L	SIP_L1_4	224154	224457	224499	99.85	99.98	-0.13
2L	SIP_L1_5	214661	215049	219938	97.6	97.78	-0.18
2L	SIP_L1_6	214659	215034	219924	97.61	97.78	-0.17
2L	SIP_L1_7	187503	187768	204974	91.48	91.61	-0.13
2L	SIP_L1_8	223483	223813	223864	99.83	99.98	-0.15
2L	SIP_L1_9	214714	215080	219967	97.61	97.78	-0.17
2L	SIP_L2_1	180700	181194	204404	88.4	88.65	-0.24
2L	SIP_L2_10	217737	218144	220765	98.63	98.81	-0.18
2L	SIP_L2_2	179889	180996	204230	88.08	88.62	-0.54
2L	SIP_L2_3	190871	191326	211899	90.08	90.29	-0.21
2L	SIP_L2_4	182194	181305	204470	89.11	88.67	0.43
2L	SIP_L2_5	160317	163454	191159	83.87	85.51	-1.64
2L	SIP_L2_6	202187	204396	214238	94.37	95.41	-1.03
2L	SIP_L2_7	217887	218197	220804	98.68	98.82	-0.14
2L	SIP_L2_8	217753	218157	220765	98.64	98.82	-0.18
2L	SIP_S1_1	195262	195634	217709	89.69	89.86	-0.17
2L	SIP_S1_10	132322	132420	184106	71.87	71.93	-0.05
2L	SIP_S1_2	133100	132475	184146	72.28	71.94	0.34
2L	SIP_S1_3	132206	132432	184110	71.81	71.93	-0.12
2L	SIP_S1_4	234422	234718	237489	98.71	98.83	-0.12
2L	SIP_S1_5	234558	234788	237541	98.74	98.84	-0.1
2L	SIP_S1_6	132231	132424	184110	71.82	71.93	-0.1
2L	SIP_S1_7	126847	126983	181406	69.92	70	-0.07
2L	SIP_S1_8	234175	234719	237487	98.61	98.83	-0.23
2L	SIP_S1_9	132231	132420	184112	71.82	71.92	-0.1
2L	SIP_S2_1	184235	184480	212439	86.72	86.84	-0.12
2L	SIP_S2_10	184513	184671	212410	86.87	86.94	-0.07
2L	SIP_S2_2	183682	183753	211954	86.66	86.69	-0.03
2L	SIP_S2_3	183526	183704	211974	86.58	86.66	-0.08
2L	SIP_S2_4	183496	183707	211979	86.56	86.66	-0.1
2L	SIP_S2_5	183486	183699	211971	86.56	86.66	-0.1
2L	SIP_S2_6	191629	191550	215874	88.77	88.73	0.04
2L	SIP_S2_7	233655	234238	237255	98.48	98.73	-0.25
2L	SIP_S2_8	183583	183713	211968	86.61	86.67	-0.06
2L	SIP_S2_9	183442	183718	211988	86.53	86.66	-0.13
2R	SIP_L1_1	201523	201888	201926	99.8	99.98	-0.18
2R	SIP_L1_10	201487	201870	201905	99.79	99.98	-0.19
2R	SIP_L1_2	201444	201836	201875	99.79	99.98	-0.19
2R	SIP_L1_3	201655	202065	202117	99.77	99.97	-0.2
2R	SIP_L1_4	193647	193915	201782	95.97	96.1	-0.13
2R	SIP_L1_5	193559	193896	201760	95.94	96.1	-0.17
2R	SIP_L1_6	198210	198594	201601	98.32	98.51	-0.19
2R	SIP_L1_7	201462	201883	201914	99.78	99.98	-0.21
2R	SIP_L1_8	201466	201831	201875	99.8	99.98	-0.18
2R	SIP_L1_9	201464	201869	201911	99.78	99.98	-0.2
2R	SIP_L2_1	161668	161758	195973	82.5	82.54	-0.05
2R	SIP_L2_10	192699	192988	199524	96.58	96.72	-0.14
2R	SIP_L2_2	166389	164635	195954	84.91	84.02	0.9
2R	SIP_L2_3	186771	186664	197527	94.55	94.5	0.05
2R	SIP_L2_4	190431	191186	198598	95.89	96.27	-0.38
2R	SIP_L2_5	164549	165634	196537	83.72	84.28	-0.55
2R	SIP_L2_6	148847	149839	194909	76.37	76.88	-0.51
2R	SIP_L2_7	173950	170700	196957	88.32	86.67	1.65
2R	SIP_L2_8	184333	184354	198838	92.71	92.72	-0.01
2R	SIP_S1_1	193850	194159	206196	94.01	94.16	-0.15
2R	SIP_S1_10	120727	120435	201582	59.89	59.74	0.14
2R	SIP_S1_2	120580	120122	200489	60.14	59.91	0.23
2R	SIP_S1_3	120845	120729	200328	60.32	60.27	0.06
2R	SIP_S1_4	157914	157952	204015	77.4	77.42	-0.02
2R	SIP_S1_5	205223	205651	205678	99.78	99.99	-0.21
2R	SIP_S1_6	137049	137021	201894	67.88	67.87	0.01
2R	SIP_S1_7	124156	123959	201517	61.61	61.51	0.1
2R	SIP_S1_8	163555	164269	204375	80.03	80.38	-0.35
2R	SIP_S1_9	117489	117310	200886	58.49	58.4	0.09
2R	SIP_S2_1	190739	191047	205515	92.81	92.96	-0.15
2R	SIP_S2_10	184283	184490	205132	89.84	89.94	-0.1
2R	SIP_S2_2	145794	144251	201581	72.33	71.56	0.77
2R	SIP_S2_3	154583	153530	202335	76.4	75.88	0.52
2R	SIP_S2_4	175574	175706	203757	86.17	86.23	-0.06
2R	SIP_S2_5	143974	144006	201571	71.43	71.44	-0.02
2R	SIP_S2_6	144048	144184	201603	71.45	71.52	-0.07
2R	SIP_S2_7	201034	201273	206326	97.44	97.55	-0.12
2R	SIP_S2_8	143951	144014	201582	71.41	71.44	-0.03
2R	SIP_S2_9	148599	148752	201887	73.61	73.68	-0.08
3L	SIP_L1_1	209573	209828	237546	88.22	88.33	-0.11
3L	SIP_L1_10	239007	239415	239436	99.82	99.99	-0.17
3L	SIP_L1_2	223956	224283	237396	94.34	94.48	-0.14
3L	SIP_L1_3	223918	224281	237393	94.32	94.48	-0.15
3L	SIP_L1_4	224007	224286	237391	94.36	94.48	-0.12
3L	SIP_L1_5	223922	224310	237397	94.32	94.49	-0.16
3L	SIP_L1_6	209168	206500	236123	88.58	87.45	1.13
3L	SIP_L1_7	239056	239422	239451	99.84	99.99	-0.15
3L	SIP_L1_8	223497	223797	236907	94.34	94.47	-0.13
3L	SIP_L1_9	223888	224300	237403	94.31	94.48	-0.17
3L	SIP_L2_1	204969	205357	236180	86.79	86.95	-0.16
3L	SIP_L2_10	193636	193801	235507	82.22	82.29	-0.07
3L	SIP_L2_2	152518	152557	230794	66.08	66.1	-0.02
3L	SIP_L2_3	168852	168948	233100	72.44	72.48	-0.04
3L	SIP_L2_4	184667	184879	233426	79.11	79.2	-0.09
3L	SIP_L2_5	168217	168058	230849	72.87	72.8	0.07
3L	SIP_L2_6	182515	182613	233159	78.28	78.32	-0.04
3L	SIP_L2_7	178386	178227	233169	76.51	76.44	0.07
3L	SIP_L2_8	180217	178314	233182	77.29	76.47	0.82
3L	SIP_S1_1	123934	123266	227116	54.57	54.27	0.29
3L	SIP_S1_10	126333	126789	227093	55.63	55.83	-0.2
3L	SIP_S1_2	119685	120699	227682	52.57	53.01	-0.45
3L	SIP_S1_3	118061	119010	227482	51.9	52.32	-0.42
3L	SIP_S1_4	206503	206726	236921	87.16	87.26	-0.09
3L	SIP_S1_5	203385	203373	236600	85.96	85.96	0.01
3L	SIP_S1_6	118047	119360	226350	52.15	52.73	-0.58
3L	SIP_S1_7	160036	159738	229416	69.76	69.63	0.13
3L	SIP_S1_8	202161	204688	235776	85.74	86.81	-1.07
3L	SIP_S1_9	119402	120582	226511	52.71	53.23	-0.52
3L	SIP_S2_1	235626	236018	236052	99.82	99.99	-0.17
3L	SIP_S2_10	192561	192717	231736	83.09	83.16	-0.07
3L	SIP_S2_2	192615	192697	231722	83.12	83.16	-0.04
3L	SIP_S2_3	192772	192712	231732	83.19	83.16	0.03
3L	SIP_S2_4	235121	235590	235621	99.79	99.99	-0.2
3L	SIP_S2_5	224996	225436	234334	96.02	96.2	-0.19
3L	SIP_S2_6	192866	192709	231733	83.23	83.16	0.07
3L	SIP_S2_7	214161	214438	234314	91.4	91.52	-0.12
3L	SIP_S2_8	197597	197549	232277	85.07	85.05	0.02
3L	SIP_S2_9	235543	236033	236069	99.78	99.98	-0.21
3R	SIP_L1_1	213005	213266	217179	98.08	98.2	-0.12
3R	SIP_L1_10	212949	213259	213273	99.85	99.99	-0.15
3R	SIP_L1_2	178952	179094	208306	85.91	85.98	-0.07
3R	SIP_L1_3	170272	170450	206451	82.48	82.56	-0.09
3R	SIP_L1_4	176143	176288	207610	84.84	84.91	-0.07
3R	SIP_L1_5	176121	176220	207534	84.86	84.91	-0.05
3R	SIP_L1_6	195031	195297	215810	90.37	90.49	-0.12
3R	SIP_L1_7	217832	218174	218188	99.84	99.99	-0.16
3R	SIP_L1_8	174428	174584	206989	84.27	84.34	-0.08
3R	SIP_L1_9	174350	174533	206906	84.27	84.35	-0.09
3R	SIP_L2_1	202729	202070	215449	94.1	93.79	0.31
3R	SIP_L2_10	192313	192562	215417	89.27	89.39	-0.12
3R	SIP_L2_2	145796	145664	203669	71.58	71.52	0.06
3R	SIP_L2_3	159495	159378	206615	77.19	77.14	0.06
3R	SIP_L2_4	186573	186866	215102	86.74	86.87	-0.14
3R	SIP_L2_5	129492	129430	202557	63.93	63.9	0.03
3R	SIP_L2_6	187264	187457	214734	87.21	87.3	-0.09
3R	SIP_L2_7	169100	169155	207422	81.52	81.55	-0.03
3R	SIP_L2_8	169056	169197	207463	81.49	81.56	-0.07
3R	SIP_S1_1	145372	145494	194990	74.55	74.62	-0.06
3R	SIP_S1_10	104264	105285	185206	56.3	56.85	-0.55
3R	SIP_S1_2	137169	137170	192458	71.27	71.27	0
3R	SIP_S1_3	160576	160862	193348	83.05	83.2	-0.15
3R	SIP_S1_4	177561	177672	208209	85.28	85.33	-0.05
3R	SIP_S1_5	177487	177678	208191	85.25	85.34	-0.09
3R	SIP_S1_6	92782	95403	186441	49.76	51.17	-1.41
3R	SIP_S1_7	103918	103547	183049	56.77	56.57	0.2
3R	SIP_S1_8	176549	177415	207992	84.88	85.3	-0.42
3R	SIP_S1_9	95942	97850	187254	51.24	52.26	-1.02
3R	SIP_S2_1	151814	151841	191612	79.23	79.24	-0.01
3R	SIP_S2_10	156247	152150	191687	81.51	79.37	2.14
3R	SIP_S2_2	157054	156956	192055	81.78	81.72	0.05
3R	SIP_S2_3	156869	156930	192028	81.69	81.72	-0.03
3R	SIP_S2_4	177246	177477	198761	89.18	89.29	-0.12
3R	SIP_S2_5	153547	153600	191612	80.13	80.16	-0.03
3R	SIP_S2_6	167652	166140	195585	85.72	84.95	0.77
3R	SIP_S2_7	176206	176308	199453	88.34	88.4	-0.05
3R	SIP_S2_8	156548	156368	191890	81.58	81.49	0.09
3R	SIP_S2_9	172700	172896	200566	86.11	86.2	-0.1
